# Supplementary material for: Rapid radiation in spiny lobsters (Palinurus spp) as revealed by classic and ABC methods using mtDNA and microsatellite data
Source: PubMed Central journal article supplement (PMC2777881; doi:10.1186/1471-2148-9-263), 2009-11-09
Supplement: 1471-2148-9-263-S1.pdf [file 1471-2148-9-263-S1.pdf]

|                | <i>P. elephas</i> | <i>P. mauritanicus</i> | <i>P. charlestoni</i> | <i>P. gilchristi</i> | <i>P. delagoae</i> | <i>P. barbarae</i> |
|----------------|-------------------|------------------------|-----------------------|----------------------|--------------------|--------------------|
| <b>Pael-10</b> | 0.351             | 0.166                  | 0.533                 | 0.050                | 0.097              | -                  |
| <b>Pael-11</b> | 0.634             | 0.494                  | 0.378                 | 0.789                | 0.645              | 0.733              |
| <b>Pael-12</b> | 0.937             | 0.882                  | 0.933                 | 0.867                | 0.883              | 0.870              |
| <b>Pael-14</b> | 0.926             | 0.757                  | 0.911                 | 0.918                | 0.869              | 0.902              |
| <b>Pael-20</b> | 0.865             | 0.954                  | 0.956                 | 0.959                | 0.883              | 0.918              |
| <b>Pael-21</b> | 0.918             | 0.765                  | 0.711                 | 0.722                | 0.774              | 0.743              |
| <b>Pael-22</b> | 0.520             | 0.568                  | 0.714                 | 0.603                | 0.520              | 0.542              |
| <b>Pael-28</b> | 0.821             | 0.770                  | 0.778                 | 0.701                | 0.500              | 0.703              |
| <b>Pael-31</b> | 0.899             | 0.803                  | 0.929                 | 0.868                | 0.864              | 0.517              |
| <b>Pael-44</b> | 0.964             | 0.938                  | 0.933                 | 0.969                | 0.956              | 0.960              |
| <b>Pael-48</b> | 0.794             | 0.570                  | 0.889                 | 0.879                | 0.881              | 0.694              |
| <b>Pael-49</b> | 0.882             | 0.775                  | 0.511                 | 0.776                | 0.709              | 0.661              |
| <b>Pael-53</b> | 0.782             | 0.405                  | 0.733                 | 0.765                | 0.323              | 0.223              |

All markers were shown polymorphic in every tested species with the exception of PE10 in *P. barbarae*.
