# Supplementary material for: Rapid radiation in spiny lobsters (Palinurus spp) as revealed by classic and ABC methods using mtDNA and microsatellite data
Source: PubMed Central journal article supplement (PMC2777881; doi:10.1186/1471-2148-9-263), 2009-11-09
Supplement: 1471-2148-9-263-S2.pdf [file 1471-2148-9-263-S2.pdf]

| Geographic distance (Km) |                  |                       |                      |                     |                   |
|--------------------------|------------------|-----------------------|----------------------|---------------------|-------------------|
|                          | <i>P.elephas</i> | <i>P.mauritanicus</i> | <i>P.charlestoni</i> | <i>P.gilchristi</i> | <i>P.delagoae</i> |
| <i>P.mauritanicus</i>    | 1098             |                       |                      |                     |                   |
| <i>P.charlestoni</i>     | 2468             | 1370                  |                      |                     |                   |
| <i>P.gilchristi</i>      | 10338            | 9240                  | 7870                 |                     |                   |
| <i>P.delagoae</i>        | 11833            | 10735                 | 9365                 | 1495                |                   |
| <i>P.barbarae</i>        | 12538            | 11440                 | 10070                | 2200                | 705               |

| GTR Genetic distance (mtDNA data) |                  |                       |                      |                     |                   |
|-----------------------------------|------------------|-----------------------|----------------------|---------------------|-------------------|
|                                   | <i>P.elephas</i> | <i>P.mauritanicus</i> | <i>P.charlestoni</i> | <i>P.gilchristi</i> | <i>P.delagoae</i> |
| <i>P.mauritanicus</i>             | 8.13             |                       |                      |                     |                   |
| <i>P.charlestoni</i>              | 7.54             | 5.00                  |                      |                     |                   |
| <i>P.gilchristi</i>               | 6.70             | 4.69                  | 3.01                 |                     |                   |
| <i>P.delagoae</i>                 | 7.86             | 6.10                  | 3.56                 | 3.71                |                   |
| <i>P.barbarae</i>                 | 8.24             | 6.05                  | 3.77                 | 4.26                | 3.32              |

| Locus: All msat loci  |                  |                       |                      |                     |                   |
|-----------------------|------------------|-----------------------|----------------------|---------------------|-------------------|
|                       | <i>P.elephas</i> | <i>P.mauritanicus</i> | <i>P.charlestoni</i> | <i>P.gilchristi</i> | <i>P.delagoae</i> |
| <i>P.mauritanicus</i> | 0.164            |                       |                      |                     |                   |
| <i>P.charlestoni</i>  | 0.1637           | 0.1944                |                      |                     |                   |
| <i>P.gilchristi</i>   | 0.1467           | 0.1303                | 0.1285               |                     |                   |
| <i>P.delagoae</i>     | 0.1972           | 0.1893                | 0.1383               | 0.0881              |                   |
| <i>P.barbarae</i>     | 0.2164           | 0.1957                | 0.1897               | 0.095               | 0.0247            |

| Locus: PE10           |                  |                       |                      |                     |                   |
|-----------------------|------------------|-----------------------|----------------------|---------------------|-------------------|
|                       | <i>P.elephas</i> | <i>P.mauritanicus</i> | <i>P.charlestoni</i> | <i>P.gilchristi</i> | <i>P.delagoae</i> |
| <i>P.mauritanicus</i> | 0.6445           |                       |                      |                     |                   |
| <i>P.charlestoni</i>  | 0.5891           | 0.4994                |                      |                     |                   |
| <i>P.gilchristi</i>   | 0.6679           | -0.0021               | 0.7024               |                     |                   |
| <i>P.delagoae</i>     | 0.6447           | -0.0042               | 0.64                 | -0.0169             |                   |
| <i>P.barbarae</i>     | 0.6756           | 0.0455                | 0.7713               | -0.0027             | -0.0054           |

| Locus: PE11           |                  |                       |                      |                     |                   |
|-----------------------|------------------|-----------------------|----------------------|---------------------|-------------------|
|                       | <i>P.elephas</i> | <i>P.mauritanicus</i> | <i>P.charlestoni</i> | <i>P.gilchristi</i> | <i>P.delagoae</i> |
| <i>P.mauritanicus</i> | 0.2408           |                       |                      |                     |                   |
| <i>P.charlestoni</i>  | 0.4197           | 0.4716                |                      |                     |                   |
| <i>P.gilchristi</i>   | 0.2904           | 0.2706                | 0.1878               |                     |                   |
| <i>P.delagoae</i>     | 0.3624           | 0.3719                | -0.0031              | 0.132               |                   |
| <i>P.barbarae</i>     | 0.3397           | 0.3104                | 0.1298               | -0.0323             | 0.0833            |

| Locus: PE12           |                  |                       |                      |                     |                   |
|-----------------------|------------------|-----------------------|----------------------|---------------------|-------------------|
|                       | <i>P.elephas</i> | <i>P.mauritanicus</i> | <i>P.charlestoni</i> | <i>P.gilchristi</i> | <i>P.delagoae</i> |
| <i>P.mauritanicus</i> | 0.0173           |                       |                      |                     |                   |
| <i>P.charlestoni</i>  | -0.0097          | 0.008                 |                      |                     |                   |
| <i>P.gilchristi</i>   | 0.0235           | 0.0515                | -0.0054              |                     |                   |
| <i>P.delagoae</i>     | 0.0159           | 0.0204                | 0.0095               | 0.0045              |                   |
| <i>P.barbarae</i>     | 0.0236           | 0.0309                | -0.0159              | 0.003               | 0.002             |

| Locus: PE14           |  | <i>P.elephas</i> | <i>P.mauritanicus</i> | <i>P.charlestoni</i> | <i>P.gilchristi</i> | <i>P.delagoae</i> |
|-----------------------|--|------------------|-----------------------|----------------------|---------------------|-------------------|
| <i>P.mauritanicus</i> |  | 0.0348           |                       |                      |                     |                   |
| <i>P.charlestoni</i>  |  | 0.0356           | 0.1201                |                      |                     |                   |
| <i>P.gilchristi</i>   |  | -0.0005          | 0.0641                | 0.0195               |                     |                   |
| <i>P.delagoae</i>     |  | 0.0208           | 0.0526                | 0.045                | 0.0089              |                   |
| <i>P.barbarae</i>     |  | 0.0326           | 0.0901                | 0.0224               | 0.0104              | 0.0281            |

| Locus: PE20           |  | <i>P.elephas</i> | <i>P.mauritanicus</i> | <i>P.charlestoni</i> | <i>P.gilchristi</i> | <i>P.delagoae</i> |
|-----------------------|--|------------------|-----------------------|----------------------|---------------------|-------------------|
| <i>P.mauritanicus</i> |  | 0.0353           |                       |                      |                     |                   |
| <i>P.charlestoni</i>  |  | 0.0126           | -0.0179               |                      |                     |                   |
| <i>P.gilchristi</i>   |  | 0.0464           | -0.0041               | -0.0087              |                     |                   |
| <i>P.delagoae</i>     |  | 0.0694           | 0.0079                | -0.0121              | 0.0166              |                   |
| <i>P.barbarae</i>     |  | 0.0729           | 0.0083                | -0.0055              | 0.0049              | -0.0082           |

| Locus: PE21           |  | <i>P.elephas</i> | <i>P.mauritanicus</i> | <i>P.charlestoni</i> | <i>P.gilchristi</i> | <i>P.delagoae</i> |
|-----------------------|--|------------------|-----------------------|----------------------|---------------------|-------------------|
| <i>P.mauritanicus</i> |  | 0.1273           |                       |                      |                     |                   |
| <i>P.charlestoni</i>  |  | 0.1283           | 0.085                 |                      |                     |                   |
| <i>P.gilchristi</i>   |  | 0.1384           | 0.2025                | 0.2338               |                     |                   |
| <i>P.delagoae</i>     |  | 0.1188           | 0.1276                | 0.0344               | 0.0772              |                   |
| <i>P.barbarae</i>     |  | 0.133            | 0.1535                | 0.061                | 0.1263              | 0.0032            |

| Locus: PE22           |  | <i>P.elephas</i> | <i>P.mauritanicus</i> | <i>P.charlestoni</i> | <i>P.gilchristi</i> | <i>P.delagoae</i> |
|-----------------------|--|------------------|-----------------------|----------------------|---------------------|-------------------|
| <i>P.mauritanicus</i> |  | 0.0636           |                       |                      |                     |                   |
| <i>P.charlestoni</i>  |  | 0.2658           | 0.2297                |                      |                     |                   |
| <i>P.gilchristi</i>   |  | 0.1791           | 0.141                 | 0.1778               |                     |                   |
| <i>P.delagoae</i>     |  | 0.3403           | 0.3425                | 0.2482               | 0.0756              |                   |
| <i>P.barbarae</i>     |  | 0.3494           | 0.3384                | 0.2461               | 0.0914              | -0.0299           |

| Locus: PE28           |  | <i>P.elephas</i> | <i>P.mauritanicus</i> | <i>P.charlestoni</i> | <i>P.gilchristi</i> | <i>P.delagoae</i> |
|-----------------------|--|------------------|-----------------------|----------------------|---------------------|-------------------|
| <i>P.mauritanicus</i> |  | 0.1242           |                       |                      |                     |                   |
| <i>P.charlestoni</i>  |  | 0.0932           | 0.0652                |                      |                     |                   |
| <i>P.gilchristi</i>   |  | 0.1109           | 0.2203                | 0.1047               |                     |                   |
| <i>P.delagoae</i>     |  | 0.2227           | 0.3091                | 0.0811               | 0.2066              |                   |
| <i>P.barbarae</i>     |  | 0.1077           | 0.2115                | 0.0294               | 0.1392              | 0.0569            |

| Locus: PE31           |  | <i>P.elephas</i> | <i>P.mauritanicus</i> | <i>P.charlestoni</i> | <i>P.gilchristi</i> | <i>P.delagoae</i> |
|-----------------------|--|------------------|-----------------------|----------------------|---------------------|-------------------|
| <i>P.mauritanicus</i> |  | 0.1063           |                       |                      |                     |                   |
| <i>P.charlestoni</i>  |  | 0.0812           | 0.0558                |                      |                     |                   |
| <i>P.gilchristi</i>   |  | 0.101            | 0.0549                | 0.0694               |                     |                   |
| <i>P.delagoae</i>     |  | 0.0882           | 0.0473                | 0.0081               | 0.0098              |                   |
| <i>P.barbarae</i>     |  | 0.2342           | 0.1273                | 0.2546               | 0.1263              | 0.0209            |

| Locus: PE44           |  | <i>P.elephas</i> | <i>P.mauritanicus</i> | <i>P.charlestoni</i> | <i>P.gilchristi</i> | <i>P.delagoae</i> |
|-----------------------|--|------------------|-----------------------|----------------------|---------------------|-------------------|
| <i>P.mauritanicus</i> |  | 0.0218           |                       |                      |                     |                   |
| <i>P.charlestoni</i>  |  | 0.0218           | 0.0375                |                      |                     |                   |
| <i>P.gilchristi</i>   |  | 0.0151           | 0.0123                | 0.0272               |                     |                   |
| <i>P.delagoae</i>     |  | 0.0101           | 0.0111                | 0.004                | -0.009              |                   |
| <i>P.barbarae</i>     |  | 0.0235           | 0.0231                | -0.0021              | 0.0208              | 0.0087            |

| Locus: PE48           |  | <i>P.elephas</i> | <i>P.mauritanicus</i> | <i>P.charlestoni</i> | <i>P.gilchristi</i> | <i>P.delagoae</i> |
|-----------------------|--|------------------|-----------------------|----------------------|---------------------|-------------------|
| <i>P.mauritanicus</i> |  | 0.2901           |                       |                      |                     |                   |
| <i>P.charlestoni</i>  |  | 0.1974           | 0.3092                |                      |                     |                   |
| <i>P.gilchristi</i>   |  | 0.0749           | 0.201                 | 0.0826               |                     |                   |
| <i>P.delagoae</i>     |  | 0.1078           | 0.2448                | 0.0108               | 0.0129              |                   |
| <i>P.barbarae</i>     |  | 0.1738           | 0.3395                | 0.2055               | 0.0722              | 0.0732            |

| Locus: PE49           |  | <i>P.elephas</i> | <i>P.mauritanicus</i> | <i>P.charlestoni</i> | <i>P.gilchristi</i> | <i>P.delagoae</i> |
|-----------------------|--|------------------|-----------------------|----------------------|---------------------|-------------------|
| <i>P.mauritanicus</i> |  | 0.1078           |                       |                      |                     |                   |
| <i>P.charlestoni</i>  |  | 0.2374           | 0.3207                |                      |                     |                   |
| <i>P.gilchristi</i>   |  | 0.1077           | 0.1281                | 0.3066               |                     |                   |
| <i>P.delagoae</i>     |  | 0.1366           | 0.1315                | 0.3323               | 0.2054              |                   |
| <i>P.barbarae</i>     |  | 0.1657           | 0.0556                | 0.394                | 0.2094              | 0.0378            |

| Locus: PE53           |  | <i>P.elephas</i> | <i>P.mauritanicus</i> | <i>P.charlestoni</i> | <i>P.gilchristi</i> | <i>P.delagoae</i> |
|-----------------------|--|------------------|-----------------------|----------------------|---------------------|-------------------|
| <i>P.mauritanicus</i> |  | 0.2534           |                       |                      |                     |                   |
| <i>P.charlestoni</i>  |  | 0.0846           | 0.4485                |                      |                     |                   |
| <i>P.gilchristi</i>   |  | 0.1474           | 0.2416                | 0.0363               |                     |                   |
| <i>P.delagoae</i>     |  | 0.3293           | 0.5802                | 0.5159               | 0.3109              |                   |
| <i>P.barbarae</i>     |  | 0.3632           | 0.6285                | 0.6118               | 0.357               | -0.0184           |
