# Supplementary material for: Rapid radiation in spiny lobsters (Palinurus spp) as revealed by classic and ABC methods using mtDNA and microsatellite data
Source: PubMed Central journal article supplement (PMC2777881; doi:10.1186/1471-2148-9-263), 2009-11-09
Supplement: 1471-2148-9-263-S3.pdf [file 1471-2148-9-263-S3.pdf]

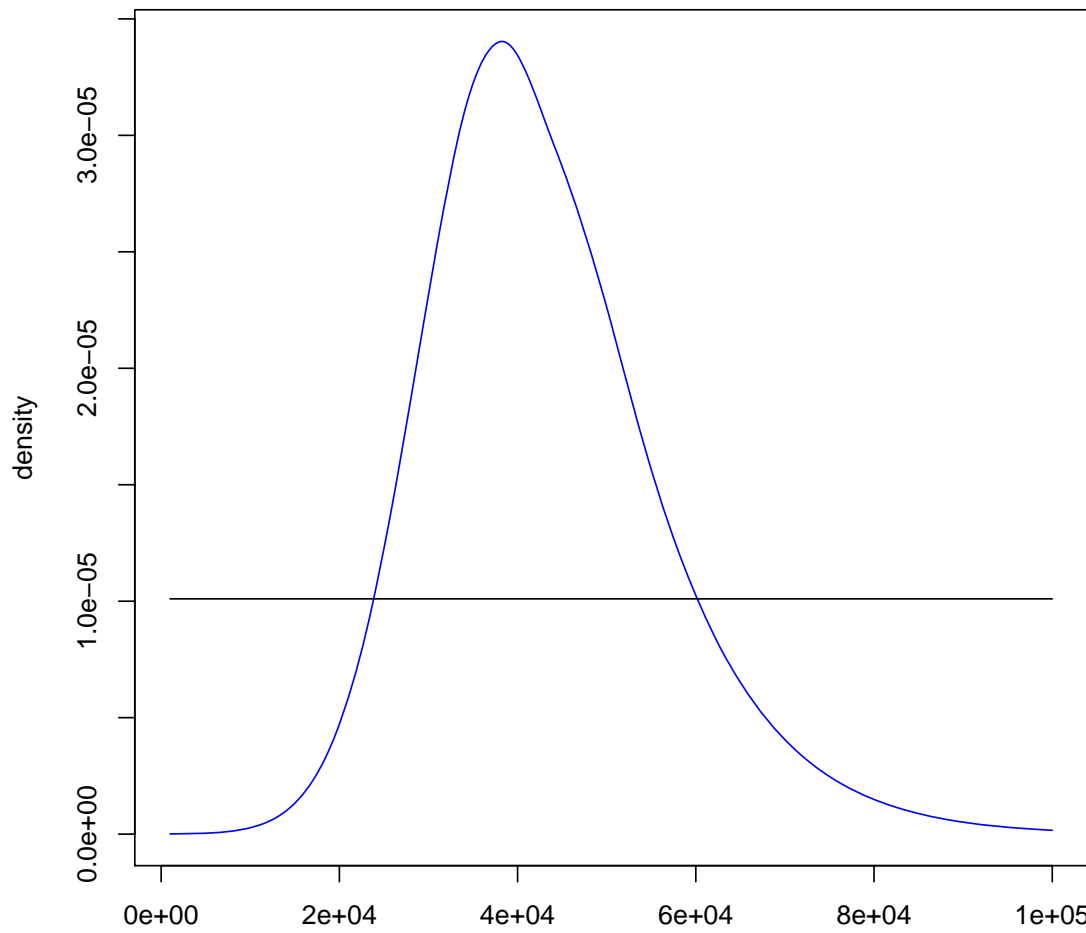

Fig. 1 – Posterior (blue) and prior (black) distribution for the estimation of *P. barbarae* population size ( $Ne_1$ ).

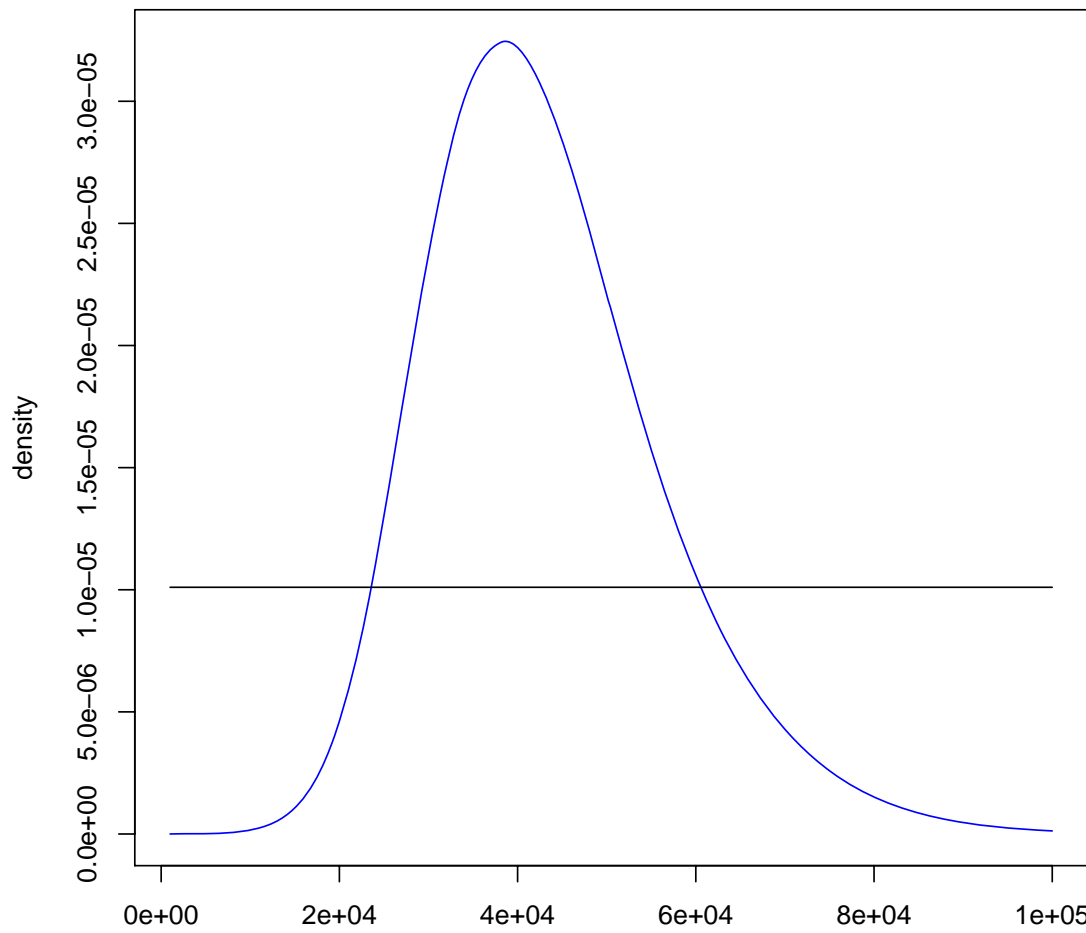

Fig. 2 – Posterior (blue) and prior (black) distribution for the estimation of *P. delagoae* population size ( $Ne_2$ ).

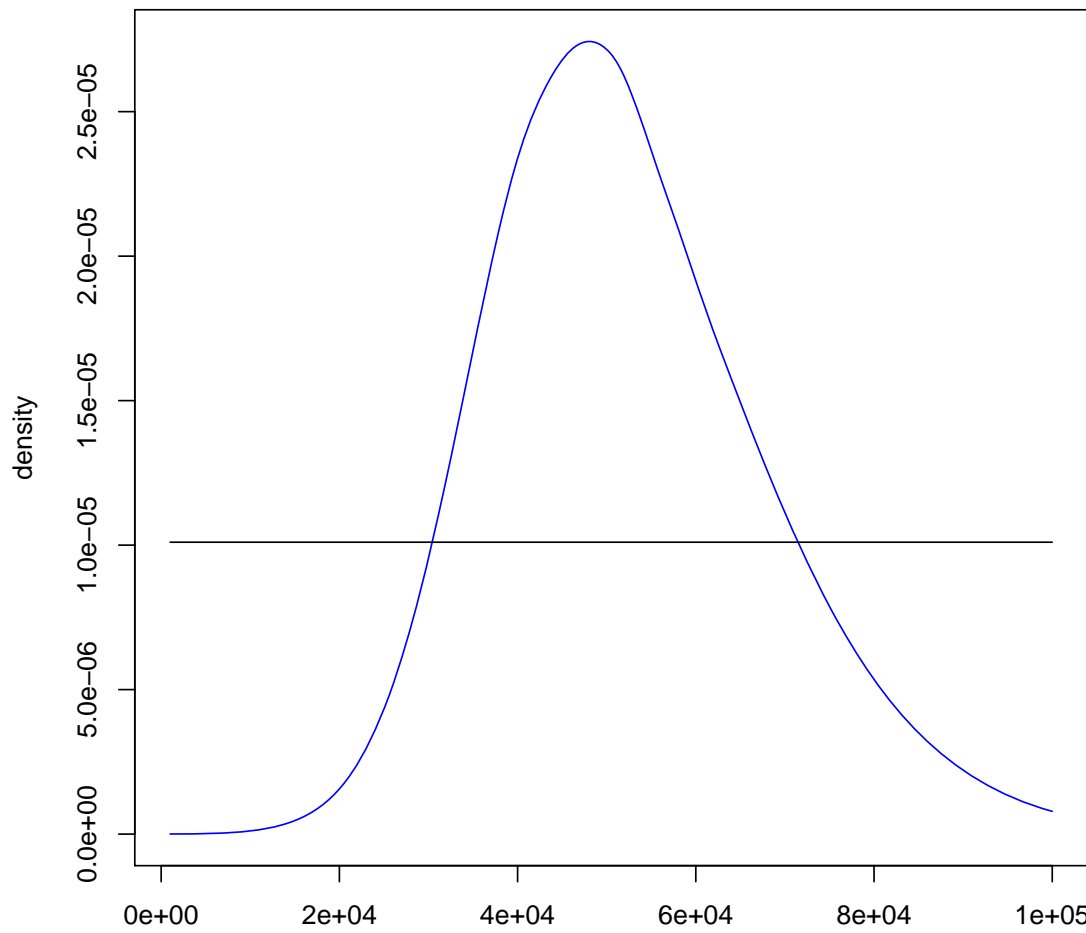

Fig. 3 – Posterior (blue) and prior (black) distribution for the estimation of *P. charlestoni* population size ( $Ne_3$ ).

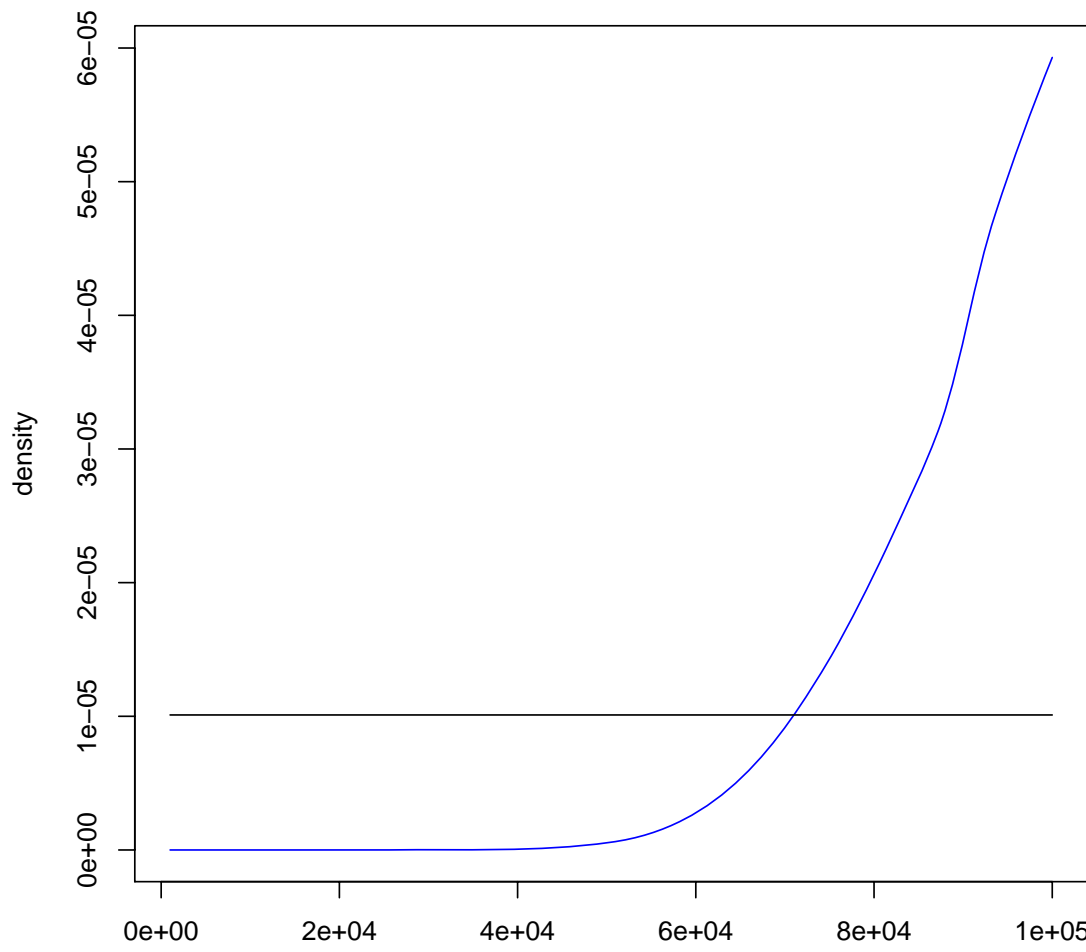

Fig. 4 – Posterior (blue) and prior (black) distribution for the estimation of *P. guilchristi* population size ( $Ne_4$ ).

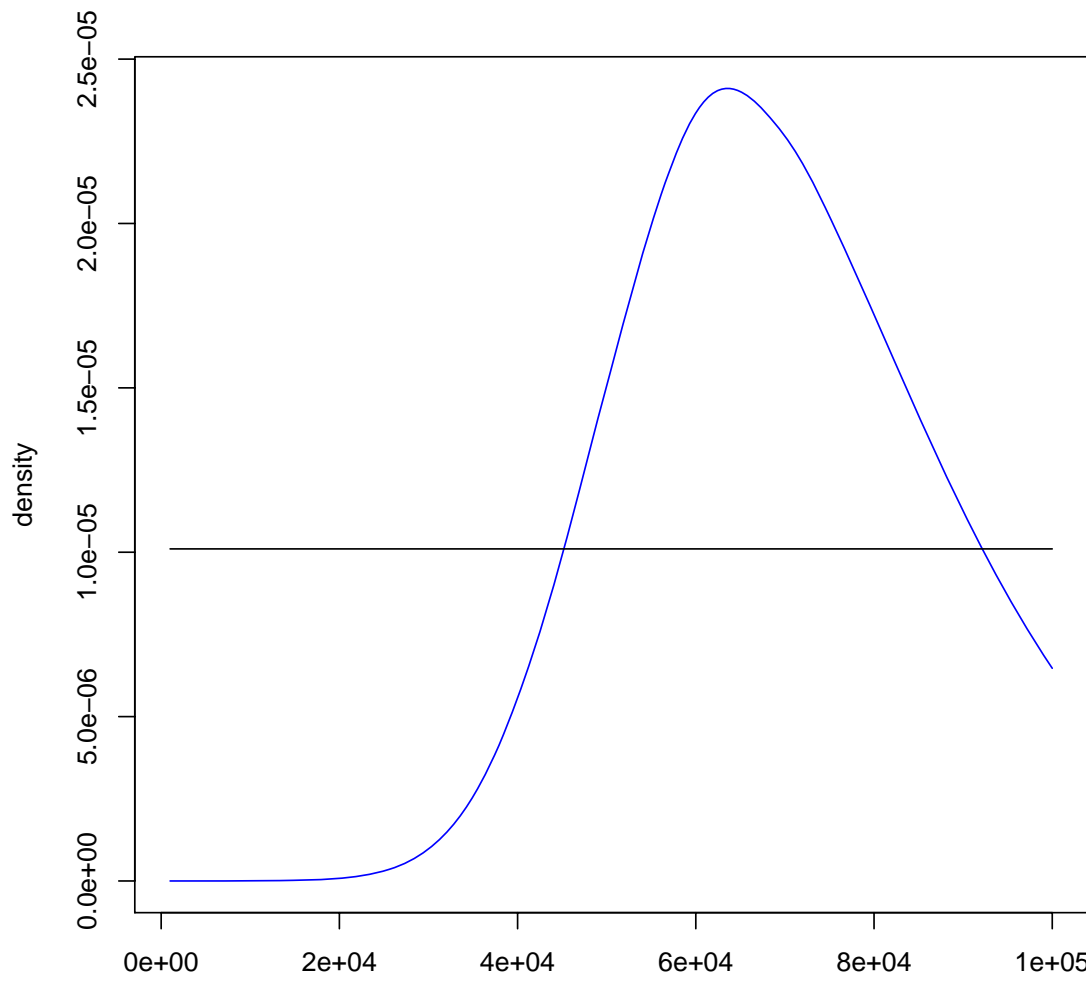

Fig. 5 – Posterior (blue) and prior (black) distribution for the estimation of *P. mauritanicus* population size ( $N_{e5}$ ).

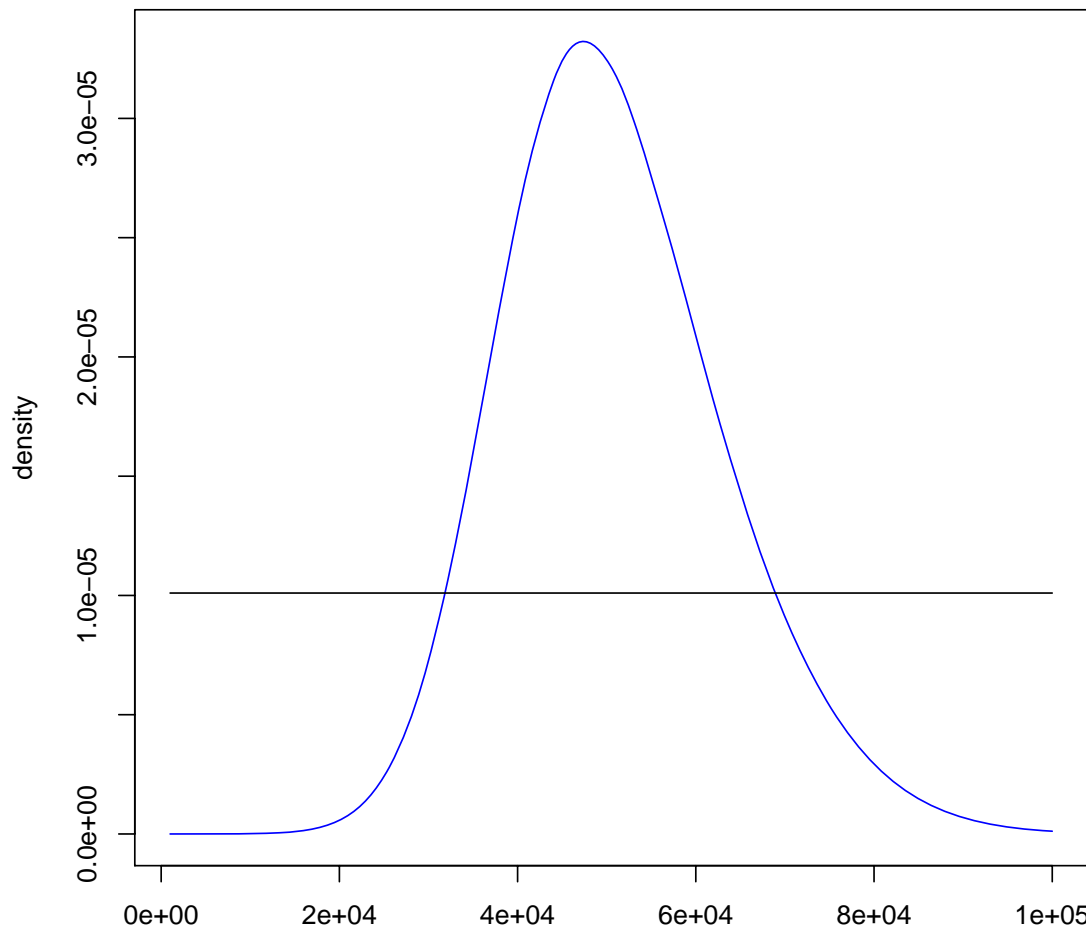

Fig. 6 – Posterior (blue) and prior (black) distribution for the estimation of *P. elephas* population size ( $N_{e_0}$ ).

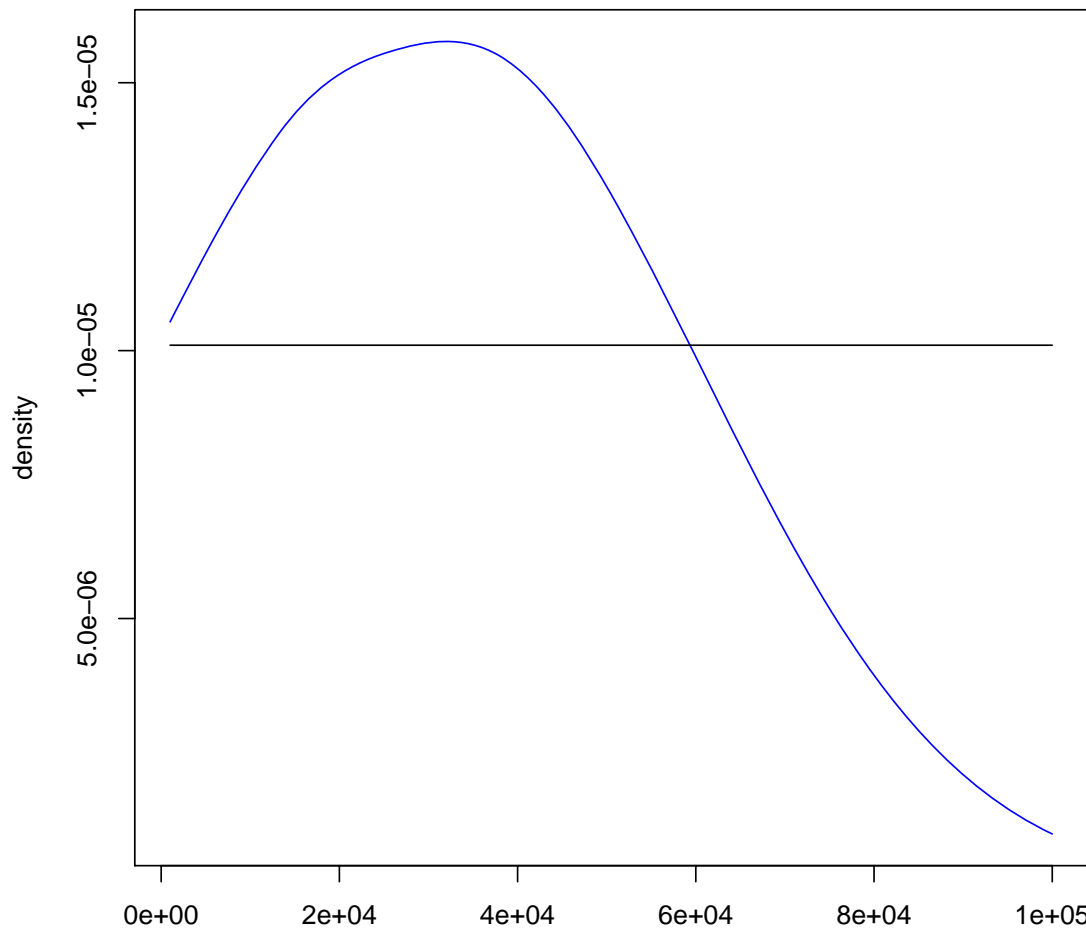

Fig. 7 – Posterior (blue) and prior (black) distribution for the estimation of the first ancestor population size ( $Ne_{A1}$ ).

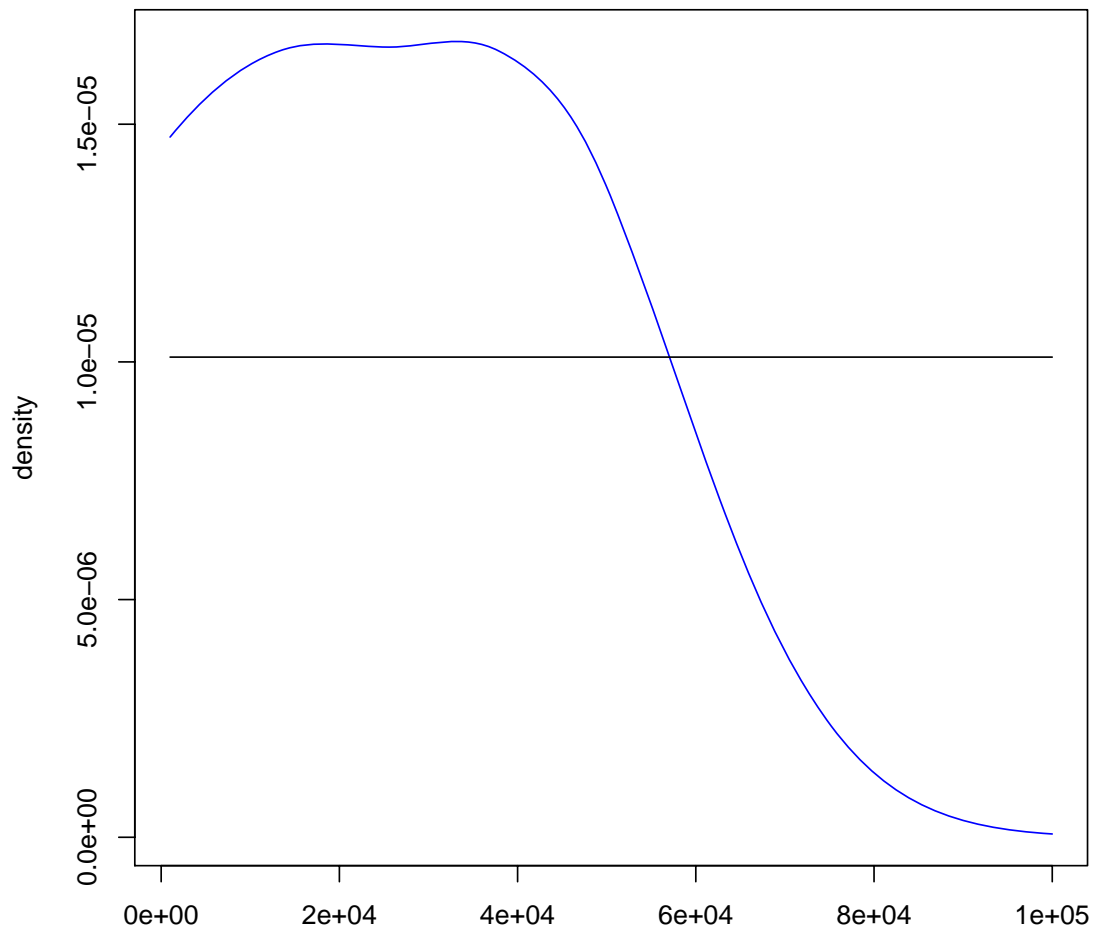

Fig. 8 – Posterior (blue) and prior (black) distribution for the estimation of the second ancestor population size ( $Ne_{A2}$ ).



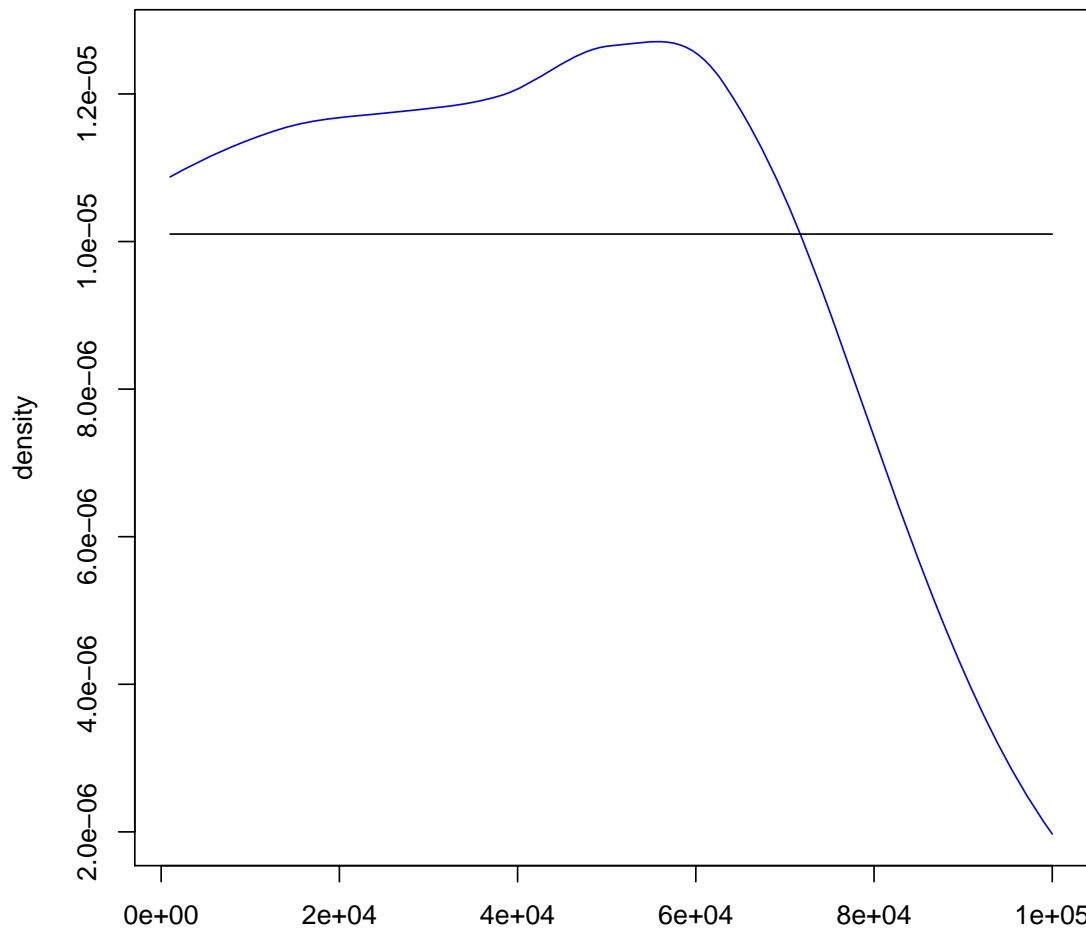

Fig. 9 – Posterior (blue) and prior (black) distribution for the estimation of the third ancestor population size ( $Ne_{A_3}$ ).

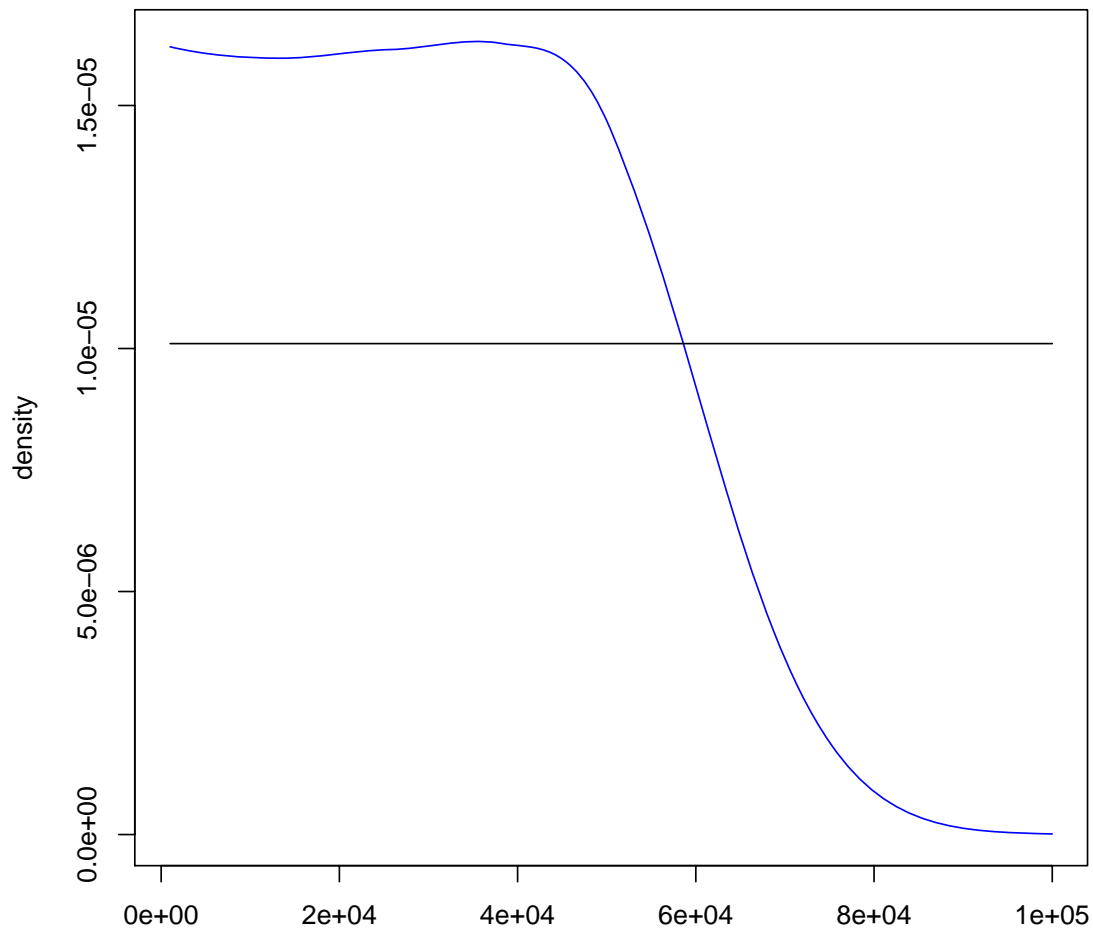

Fig. 10 – Posterior (blue) and prior (black) distribution for the estimation of the fourth ancestor population size ( $Ne_{A4}$ ).

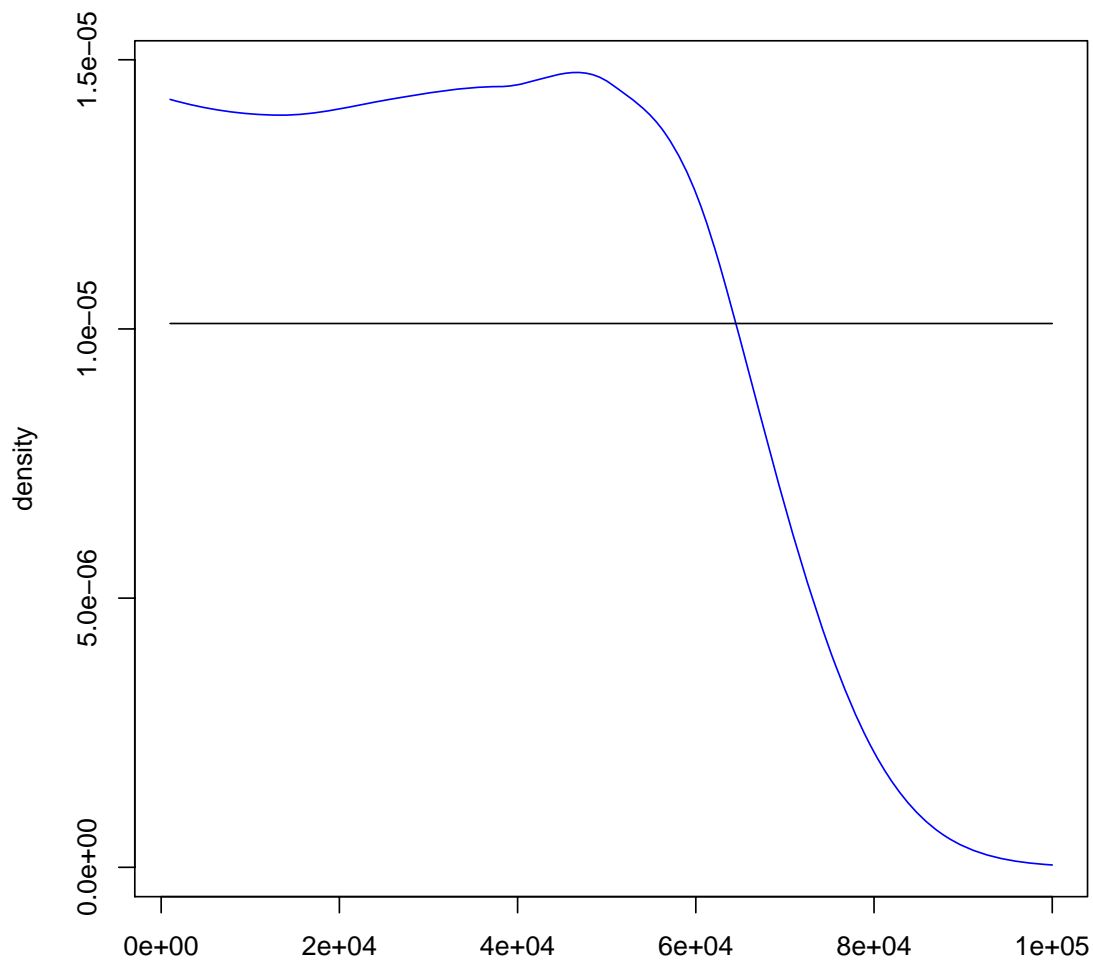

Fig. 11 – Posterior (blue) and prior (black) distribution for the estimation of the fifth ancestor population size ( $Ne_{A5}$ ).

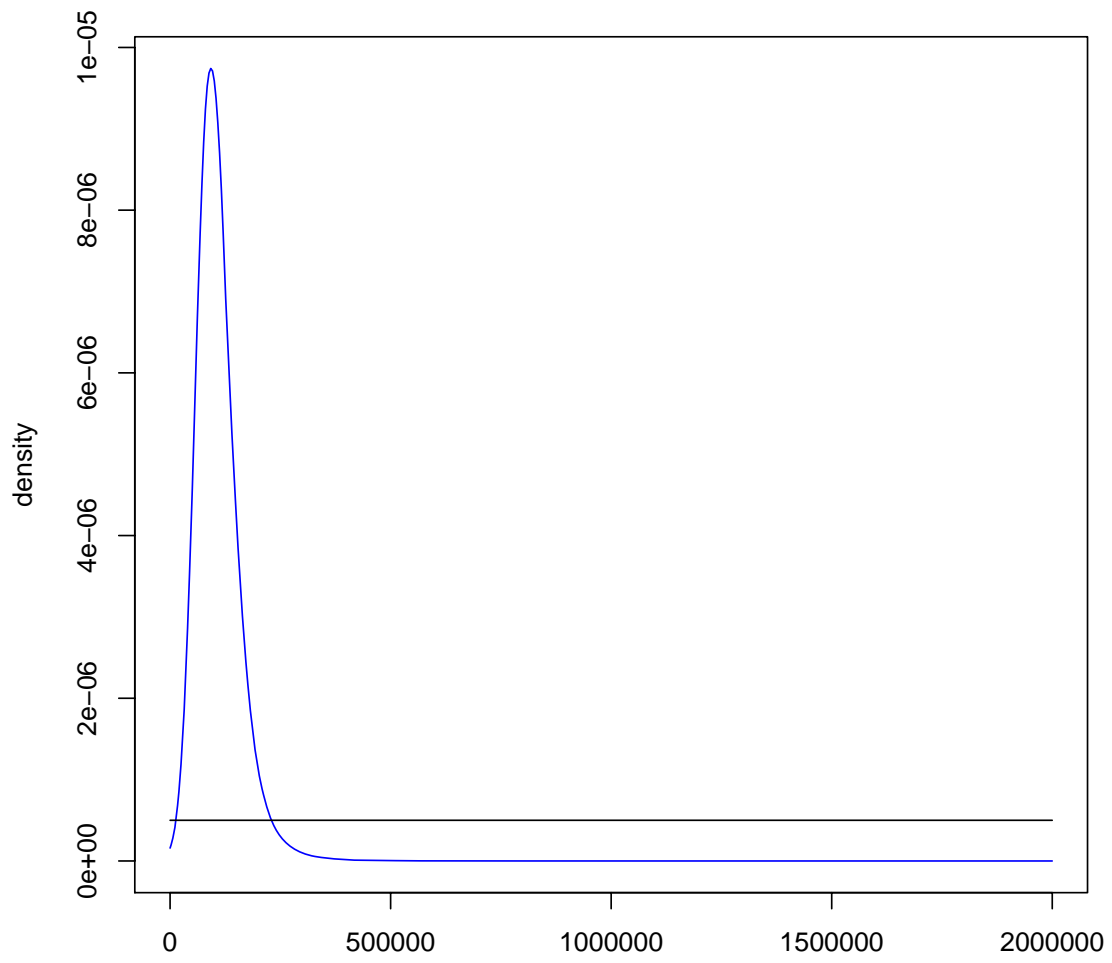

Fig. 12 – Posterior (blue) and prior (black) distribution for the estimation of first splitting event ( $t_1$ ).

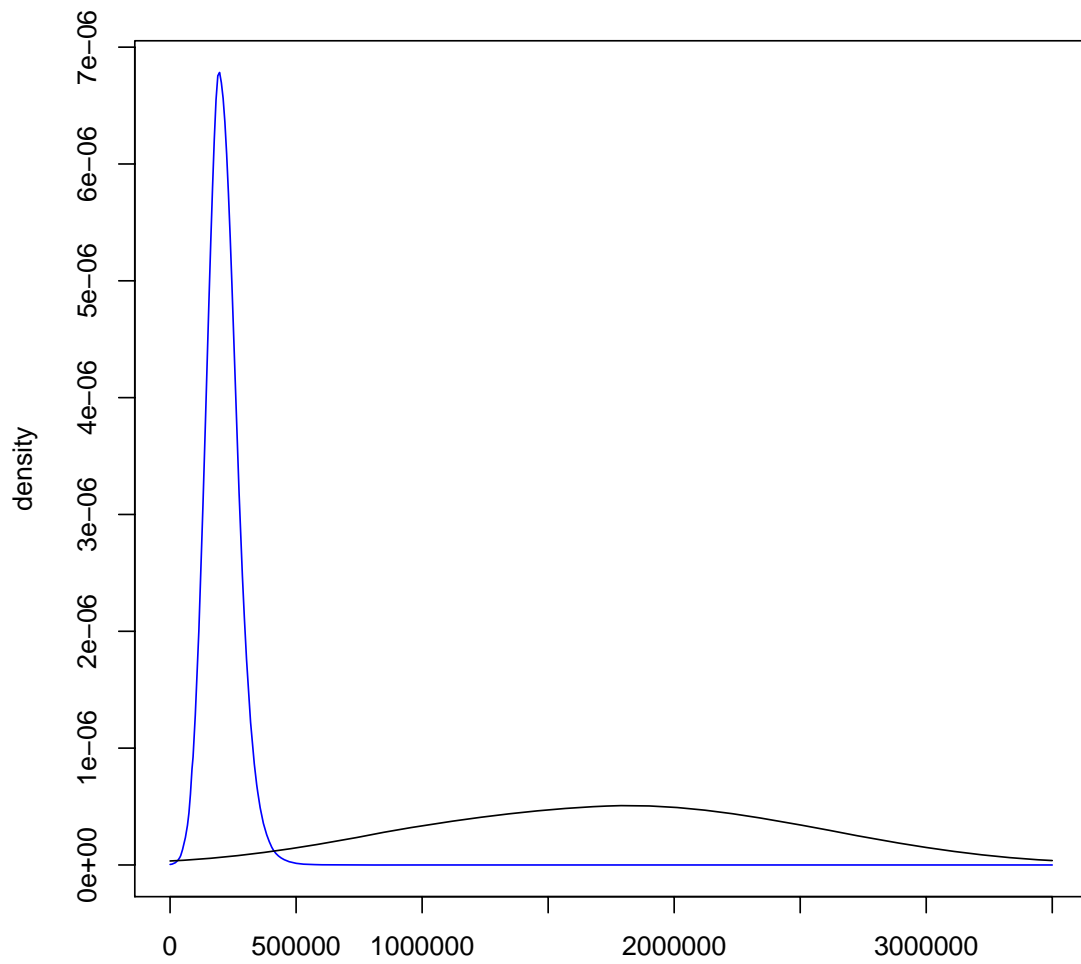

Fig. 13 – Posterior (blue) and prior (black) distribution for the estimation of second splitting event ( $t_2$ ).

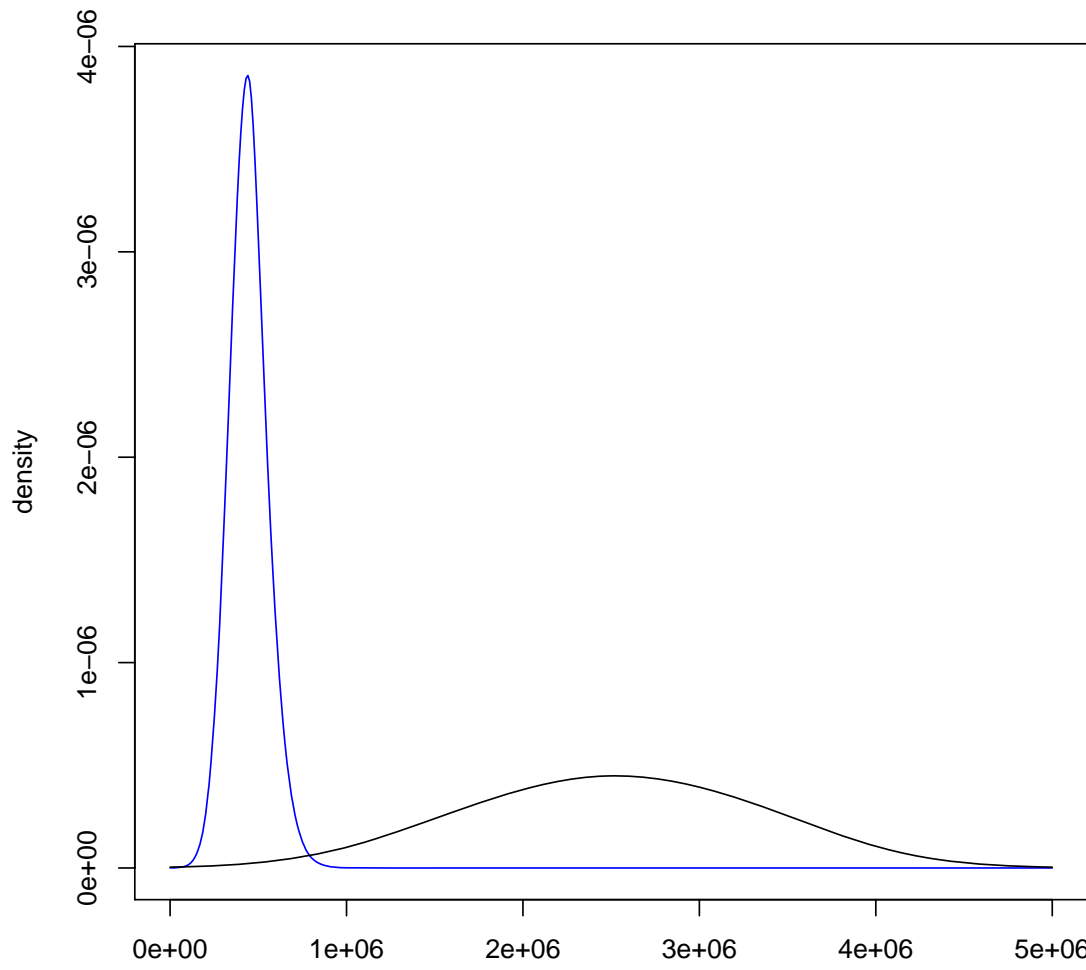

Fig. 14 – Posterior (blue) and prior (black) distribution for the estimation of third splitting event ( $t_3$ ).

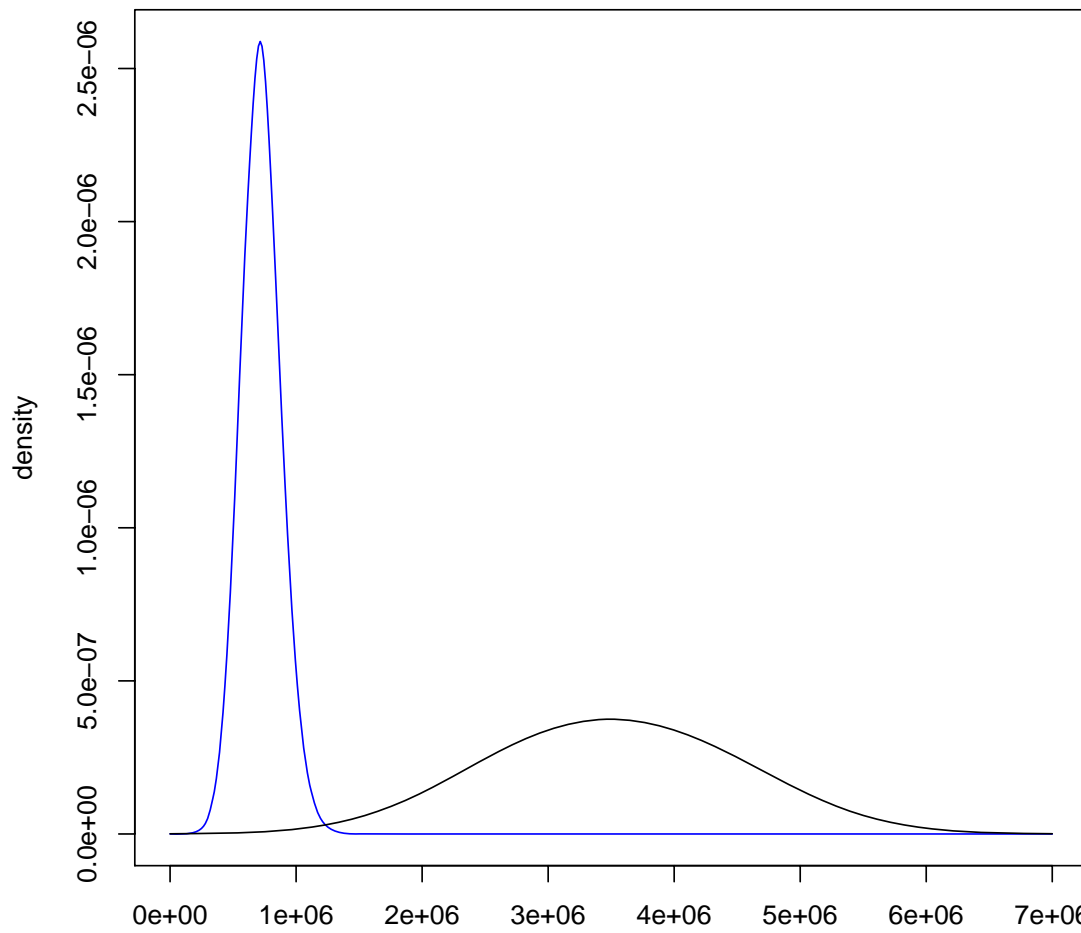

Fig. 14 – Posterior (blue) and prior (black) distribution for the estimation of forth splitting event ( $t_4$ ).

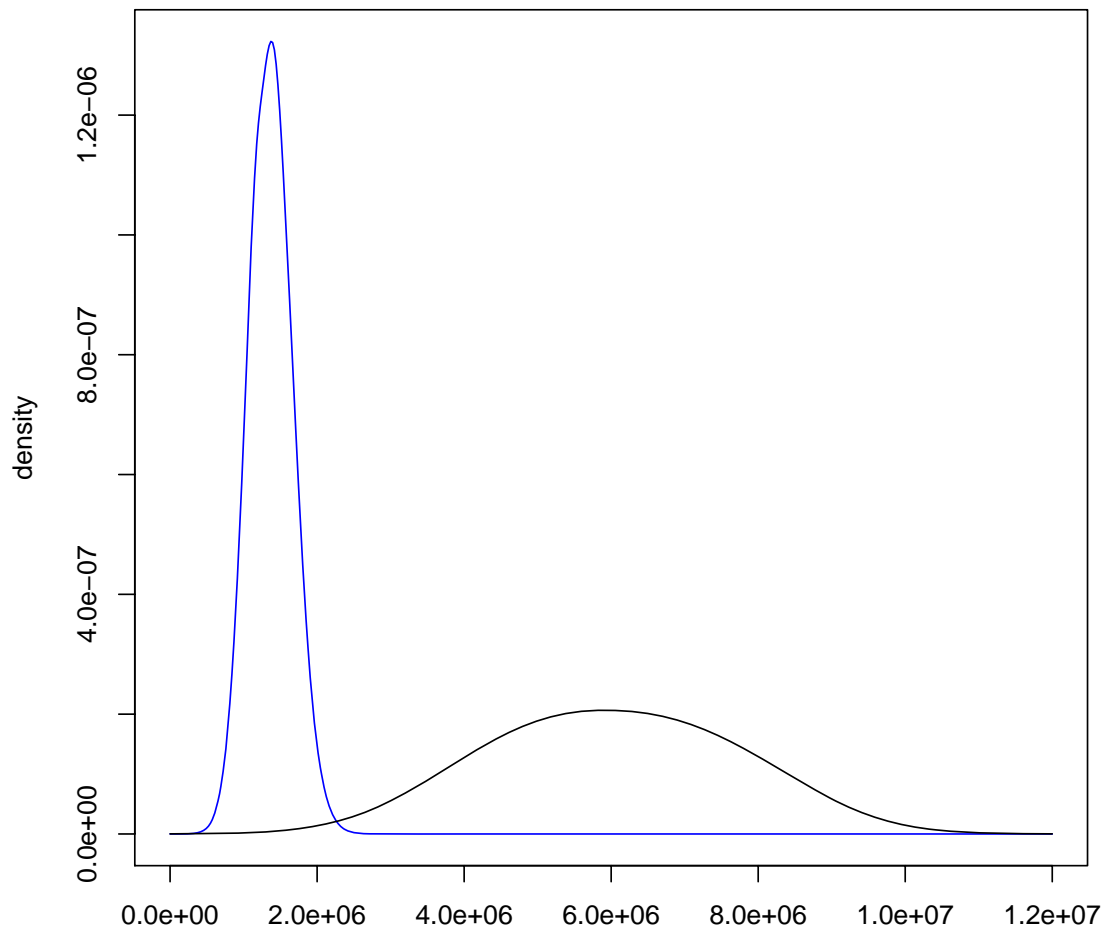

Fig. 15 – Posterior (blue) and prior (black) distribution for the estimation of fifth splitting event ( $t_5$ ).
